# Supplementary material for: Telemedicine in primary care of older adults: Results of a multi-phase study
Source: Research Square preprint supplement (doi:10.21203/rs.3.rs-2166856/v1), 2022-12-28
Supplement: Supplementary file 2 [file 4304e179b904cd7e6d7e9297.docx]

**Table 1.** Summary of identified Consolidated Framework for Implementation Research constructs with their respective valence of influence, justifications, and illustrative responses from patients and health care professionals regarding the use of telemedicine in the primary care of older adults.

| **Identified constructs per CFIR domain** | **Valence and strength of influencea** | **Justification** | **Illustrative responses** |
| --- | --- | --- | --- |
| **Intervention characteristics** | | | |
| 1. Complexity | X | - Easy to access and use phone/cellphone - No technical issues (phone/cellphone) - Difficulty using video/computer devices, accessing the portal, uploading documents (patients and HCP) - Challenges with describing health issues | *‘[…] It was more often the technical aspect was more the barrier of like firewalls and why isn't this turning on and like I could never figure that out.’ [FG1]*  *‘Since it's physical, that's why I couldn't describe it properly on the phone, I couldn't explain it properly on the phone’ [P62]* |
| **Outer setting** | | | |
| 1. Patient Needs and Resources | X | - Convenient when there is a previous/established patient-physician relationship - Suitable for minor issues that do not need visual/physical examination - Older patients preferred phone consultations - Not convenient for patients with hearing loss or a barrier language - Not suitable for an initial consultation, complex medical cases, perceived emergency | *‘I think these telephone visits, these telephone consultations are good when it stayed at a very simple level’ [P44]*  *‘For sure, for someone I already know, I would agree to do some consultations via telemedicine’ [FG2]*  *‘Not ideal at all. You have to see the doctor when you have a problem […] And if you can't, they can't see your tumor on the telephone’[P49]*  *‘As soon as there is a language barrier, as soon as you know French or English is not their first language, you lose everything, all the other ways of communicating other than just words. So, there it becomes I think much more difficult’[FG2]*  *‘[…] they just choose the phone now and it's actually very rare that I have patients choosing Visio over phone.’ [FG2]*  *‘I do find that the phone call, it lends itself a little bit to something more informal […] I've had some patients where I finished the telephone visit with them, and then they'll call back to the secretary and will be like oh, there's something I forgot to tell Doctor […], can [they] call me back? […] it's not like I just call you back, […] you have to make another appointment if you need’[FG2]* |
| **Inner setting** | | | |
| 1. Structural Characteristics | +1 | The healthcare system reorganized fast its way to assist the patients | *‘I think they did remarkably well […] I mean, they had to switch from having in-person people to the phones and that anyway, because of COVID and I think they came up with their plan rather quickly and implemented it and it worked well. […]’ [P4]* |
| 1. Implementation climate    1. Compatibility | -2 | Implementation of a web platform to write medical concerns:   - Legal implications - Professional liability issues - Organization/management challenges - Lack of resources | *‘[…] there's lots of medical legal implications to something like that, going into an online platform’ [FG1]*  *‘Why should it be something written or informal, […] it makes me feel like I can't do my job properly because I just have like this, like one- or two-line sentence from an email, and then I'm supposed to […] do my whole medical thinking process […] based on this minimal information, like no, it needs to be in [an] appointment […]’ [FG2]* |
| 1. Readiness for Implementation    1. Available Resources | +1 | - Patients have the technology equipment (phone, cellphone, computer, or tablet) - Presence of a portal – website for patients (appointment updates, documents, information) - Lack of resources to implement a web platform | *‘I use my computer, but it can be done with an iPad or iPhone, we all have these devices’ [P26]* |
| **Characteristics of Individuals** | | | |
| 1. Knowledge and Beliefs about the Intervention | X | - Knowledge (when to use TM): - Regular follow-up - Triage/preliminary consultation - Advantages: - Contribution to maintaining the continuity of care - No need to commute; save time - Flexible with time and setting - Helpful for persons with limited mobility - More frequent follow-up - Reduce the exposure of older adults to potential high-risk environments - Easier access to the physician - Faster resolution of medical concerns / medical attention - Avoid walk-in clinic for minor issues - The easier process of scheduling appointment - Contribute to a more efficient medical practice:   - Pre-triage   - Results ready for the appointment   - Reliable and direct information from the patient   - Save time - Maintain and improve physician-patient relationship:   - Sense of presence   - More communication - Disadvantages: - No visual contact (phone consultation):   - Lack of non-verbal communication   - No physical examination 🡪 important details could be missed - Miscommunication: misheard, language barrier - The perception that more difficult to make a diagnosis for a physician - The perception that consultation time is shorter (patients) - Patients may not consider phone consultation a medical act - Limitation to do and offered a proper diagnostic and treatment - The consultation time may be longer (physicians) | *‘The phone is handy if there are few questions or adjustments with medications [...] or follow-up with your tests, it's fine’ [P10]*  *‘I found was that there's sort of allowed a triage and allowed all preliminary tests to be done prior to getting him out’ [FG1]*  *‘As I said, it saves time, it saves money, and it's much more efficient.’ [P50]*  *‘For mobility limitation by doing things for them was great for like from my perspective and their perspective.’[FG1]*  *‘I think I ended up seeing some of my older patients a bit more frequently than I would if they were only coming into the clinic’[FG1]*  *‘I don't feel like it in any way damages the doctor patient relationship, I feel like it maybe even strengthens it because during this pandemic, when people were cut off from so many services, they felt at least like their family doctor was there on the phone.’ [FG2]*  *‘The drawback on that is that if you're missing some of the data that had you been in person, the doctor might've seen that you didn't think to mention, that's sort of a drawback on that.’ [P4]*  *‘[…] it was very difficult to understand what was going on with them, without anything visual either kind of visually observing the patient or observing their environment or getting some collateral information, so there's probably it was more, I think for those isolated individuals it was particularly challenging’ [FG1]* |
| 1. Individual stage of change | +1 | - We need to get used to phone/video consultations - I will continue using video/phone consultations after the pandemic, if there is a combination of in-person and TM, depending on the health condition. - If I do not have a choice, I will use phone/video consultations | *‘[…] a combination of phone, video and in person, I think is like the best solution. Maybe you can start with the phone and if that's not good enough, like switch over to video that so that they could see, and if that's not good enough, like the doctor will advise you on whether or not to come in.’ [P4]* |

1. The valence and strength of influence of each factor can be interpreted in the following ways: **+ 2** = the construct is **definitely a** **positive influence** for the use of telemedicine in the primary care of older adults, a facilitating influence in work processes, and/or a facilitating influence in implementation efforts. Interviewees describe explicit examples of how key or all aspects of the construct manifests itself in a positive way; **+ 1** = the construct is a **probably a** **positive influence** for the use of telemedicine in the primary care of older adults, a facilitating influence in work processes, and/or a facilitating influence in implementation efforts. Interviewees make general statements about the construct manifesting itself in a positive way or there is a mixed effect that is overall positive; **0** = the construct has a **neutral influence** for the use of telemedicine in the primary care of older adults; **X** = the construct has a **mixed influence** for the use of telemedicine in the primary care of older adults, the comments are equally positive and negative; – **1** = the construct is a **probably a negative influence** for the use of telemedicine in the primary care of older adults, an impeding influence in work processes, and/or an impeding influence in implementation efforts. Interviewees make general statements about the construct manifesting itself in a negative way or there is a mixed effect that is overall negative; – **2** =the construct is **definitely a** **negative influence** for the use of telemedicine in the primary care of older adults, an impeding influence in work processes, and/or an impeding influence in implementation efforts. Interviewees describe explicit examples of how key or all aspects of the construct manifest themselves negatively.
